# Supplementary material for: Pseudomonas Cyclic Lipopeptides Suppress the Rice Blast Fungus Magnaporthe oryzae by Induced Resistance and Direct Antagonism
Source: PubMed Central journal article supplement (PMC6636606; doi:10.3389/fpls.2019.00901), 2019-07-10
Supplement: Data_Sheet_1.pdf [file Data_Sheet_1.pdf]

## Supplementary Information

### CONTENT

#### Supplementary Figures

**Figure S1.** Direct effect of crude CLP extracts on spore germination in *M. oryzae*.

**Figure S2.** In vitro antagonistic test.

**Figure S3.** Phylogeny-based substrate specificity prediction of lokisin synthetases.

**Figure S4.** Phylogenetic analysis of condensation domains extracted from lokisin, and from both characterized and putative amphisin group CLPs.

**Figure S5.** Phylogeny-based substrate specificity prediction of WLIP and putative WLIP synthetases.

**Figure S6.** Phylogenetic analysis of condensation domains extracted from WLIP- and putative WLIP-producing *Pseudomonas* species.

#### Supplementary Tables

**Table S1.** Genomes used in this study

**Table S2.** Alignment of the amino acid sequence of lokisin produced by *Pseudomonas* sp. COR10 with other (putative) CLPs of the amphisin group.

**Table S3.** Homology of NRPS enzymes and proteins encoded by the flanking regions identified from the lokisin-producing *Pseudomonas* sp. COR10 and related strains.

**Table S4.** WLIP synthetases and proteins encoded by the flanking region identified from *Pseudomonas* sp. NSE1 and related strains.

**Table S5.** Alignment of amino acids sequence of WLIP produced by *Pseudomonas* sp. NSE1 and other strains

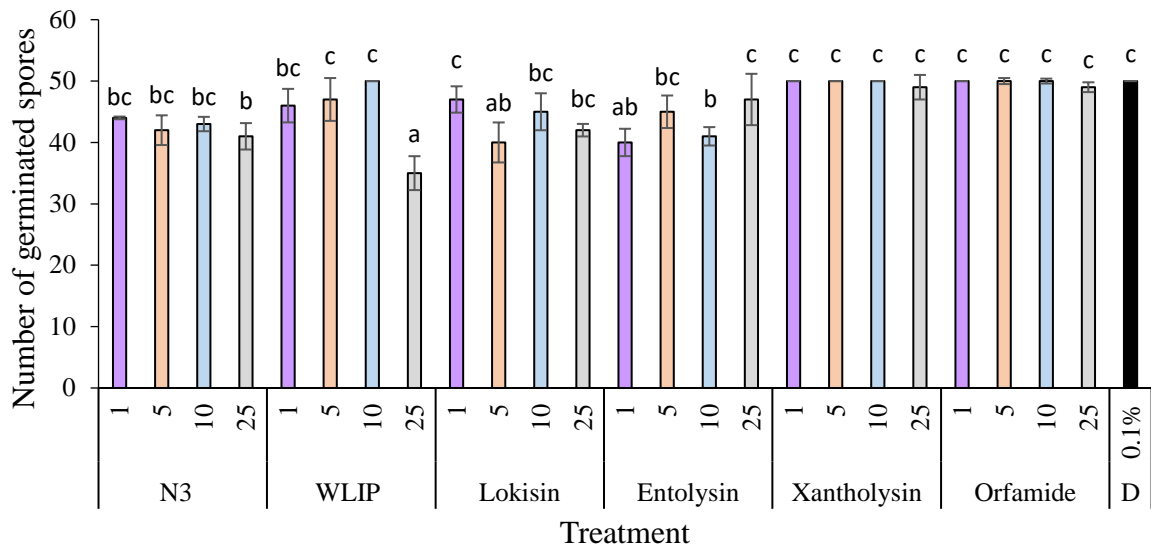

**Figure S1. Direct effect of crude CLP extracts on spore germination in *M. oryzae*.** Crude extracts were tested at concentrations ranging from 1 to 25 µg/ml. Different letters indicate statistically significant differences among the different treatments (Anova followed by a Tukey's test;  $\alpha=0.05$ ). Standard deviations are shown (n=5). D: dimethyl sulfoxide (DMSO) control.

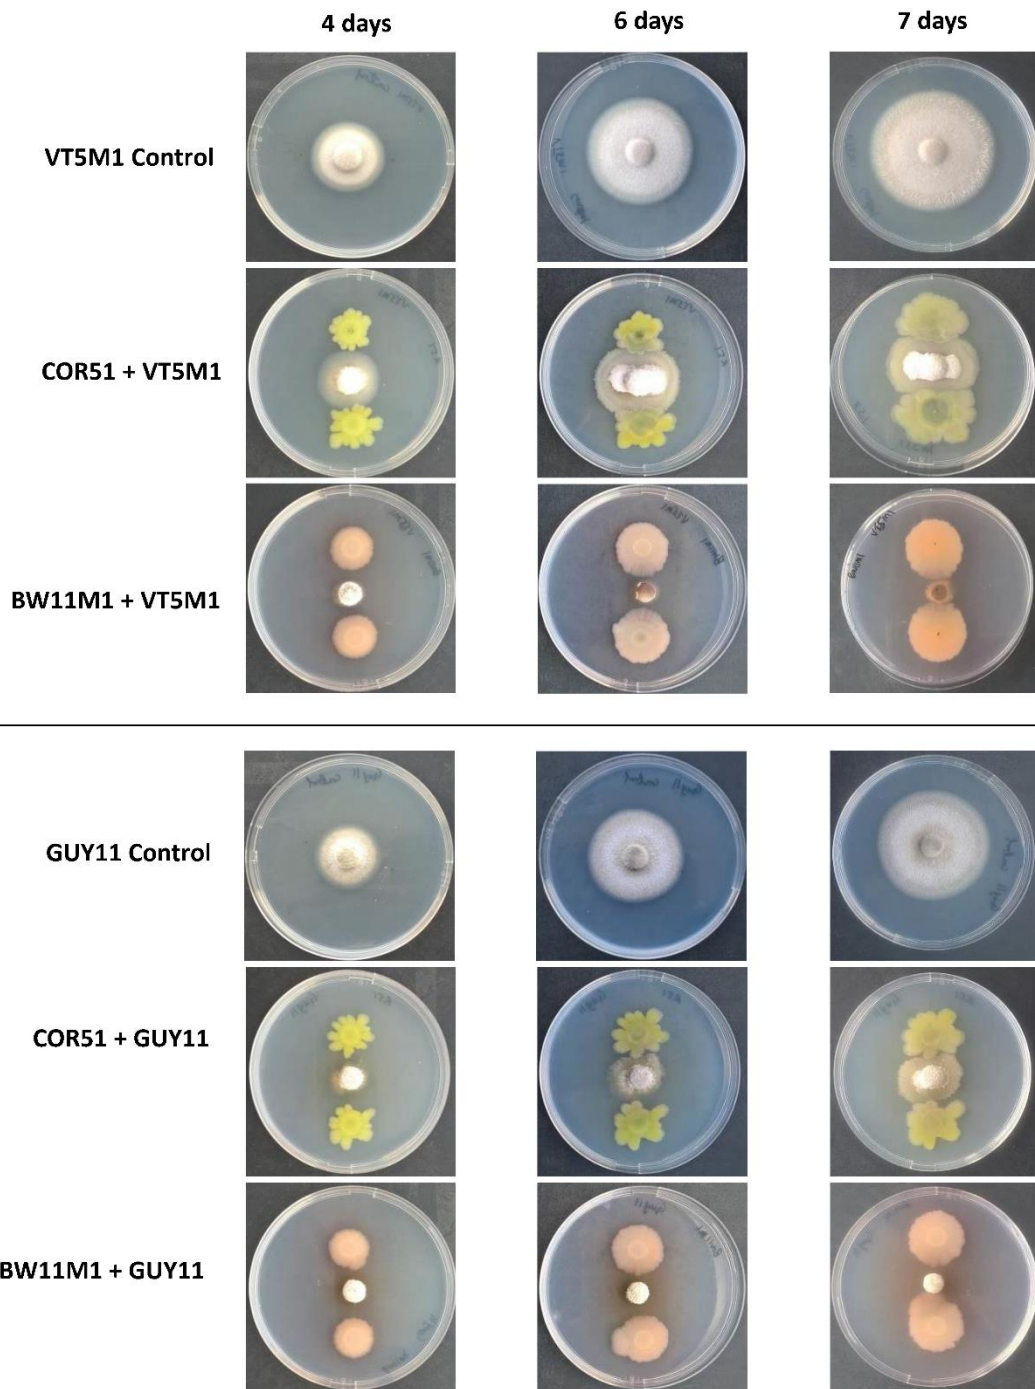

**Figure S2. In vitro antagonistic test.** Co-culturing of xantholysin producing strains COR51, and BW11M1 with *M. oryzae* VT5M1 and *M. oryzae* Guy11. Representative pictures were taken 4, 6 and 7 days, respectively, after the pathogen was added to the center of the Petri dish. The experiment was carried out with 3 repetitions and was repeated in time.

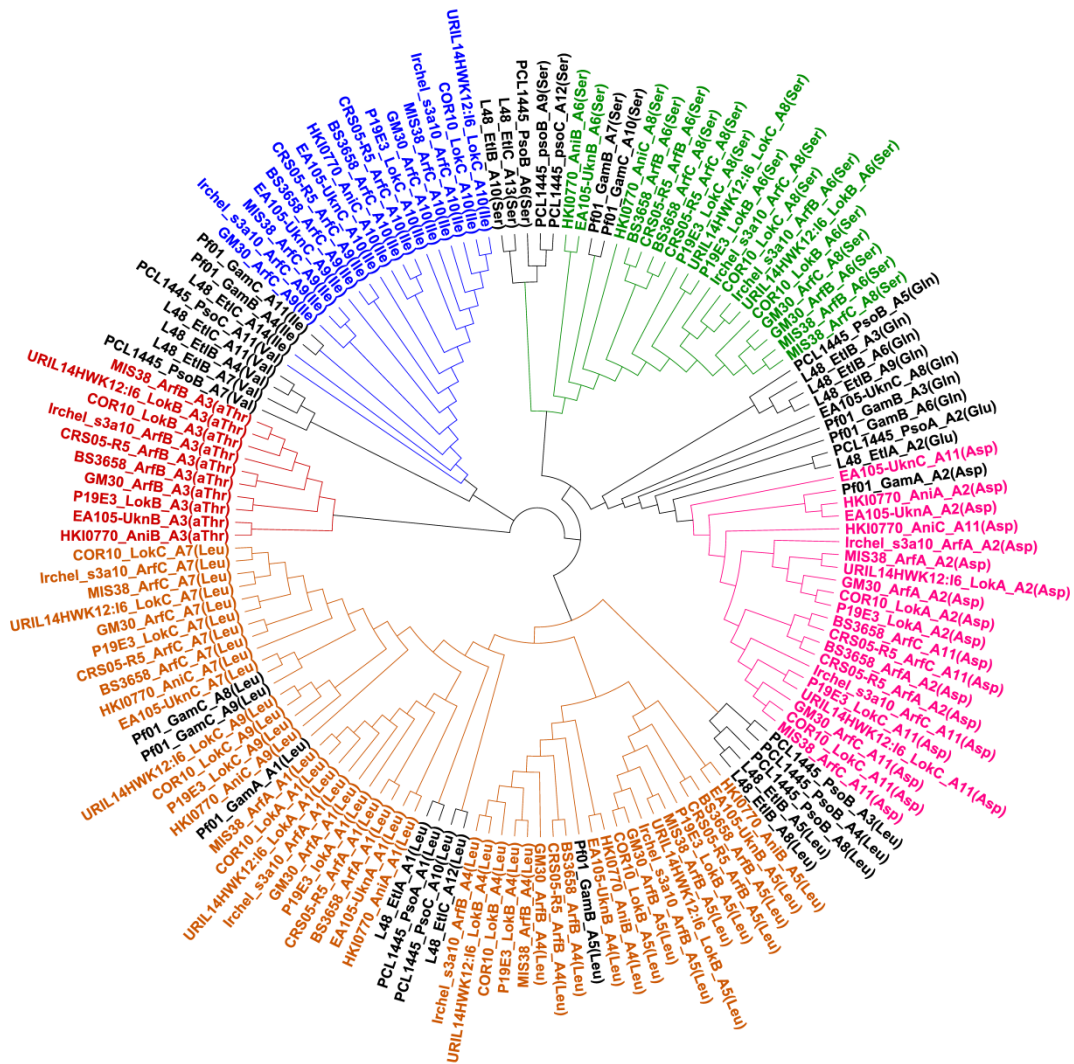

**Figure S3. Phylogeny-based substrate specificity prediction of lokisin synthetases.**

Cladogram of neighbor joining tree inferred from amino acid sequence alignment of adenylation (A) domains extracted from already characterized and putative *Pseudomonas* CLP NRPSs in the amphisin group. Lipopeptide-specific codes are: Etl (entolysin, *P. entomophila* L48); Pso (putisolvin, *P. putida* PCL1445); Gam (gacamide, *P. fluorescens* Pf01); Arf (arthrofactin, *P. fluorescens* MIS38); Lok (lokisin, *Pseudomonas* sp. COR10); Ani (anikasin, *P. fluorescens* HKI0770); Arf (putative arthrofactin, *P. koreensis* BS3658); Lok (putative lokisin, *P. koreensis* P19E3); Arf (putative arthrofactin, *P. koreensis* CRS05-R5); Ukn (putative new member of the amphisin group, *P. chlororaphis* EA105); Arf (putative arthrofactin, *Pseudomonas* sp. GM30); Lok (putative lokisin, *Pseudomonas* sp. URIL14HWK12:I6); and Arf (putative arthrofactin, *Pseudomonas* sp. Irchel\_s3a10). For each domain the substrate specificity (known or inferred) is indicated in parentheses using the standard amino acid three-letter code. The non-protein amino acid is annotated as follows: *allo*-threonine (aThr). Clusters comprising lokisin domains with different specificities are highlighted in different colors.

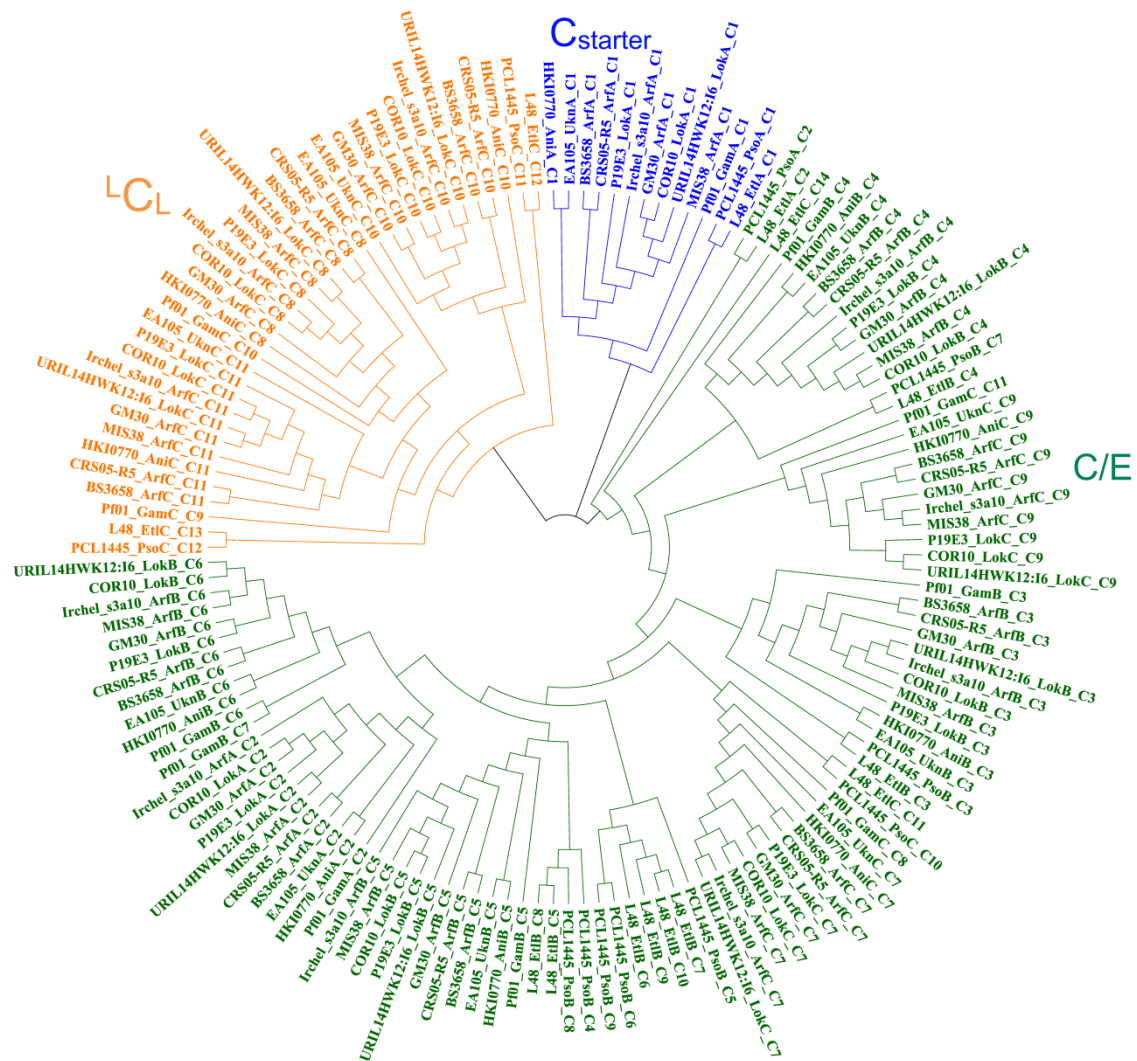

**Figure S4. Phylogenetic analysis of condensation domains from lokisin, and other characterized and putative amphisin group CLPs.**

Cladogram of neighbor joining tree inferred from amino acid sequence alignment of condensation (C) domains extracted from already characterized and putative *Pseudomonas* CLP NRPSs belonging to the amphisin group. Lipopeptide-specific codes are: Etl (entolysin, *P. entomophila* L48); Pso (putisolvin, *P. putida* PCL1445); Gam (gacamide, *P. fluorescens* Pf01); Arf (arthrofactin, *P. fluorescens* MIS38); Lok (lokisin, *Pseudomonas* sp. COR10); Ani (anikasin, *P. fluorescens* HKI0770); Arf (putative arthrofactin, *P. koreensis* BS3658); Lok (putative lokisin, *P. koreensis* P19E3); Arf (putative arthrofactin, *P. koreensis* CRS05-R5); Ukn (putative new member of the amphisin group, *P. chlororaphis* EA105); Arf (putative arthrofactin, *Pseudomonas* sp. GM30); Lok (putative lokisin, *Pseudomonas* sp. URIL14HWK12:I6); and Arf (putative arthrofactin, *Pseudomonas* sp. Irchel\_s3a10).

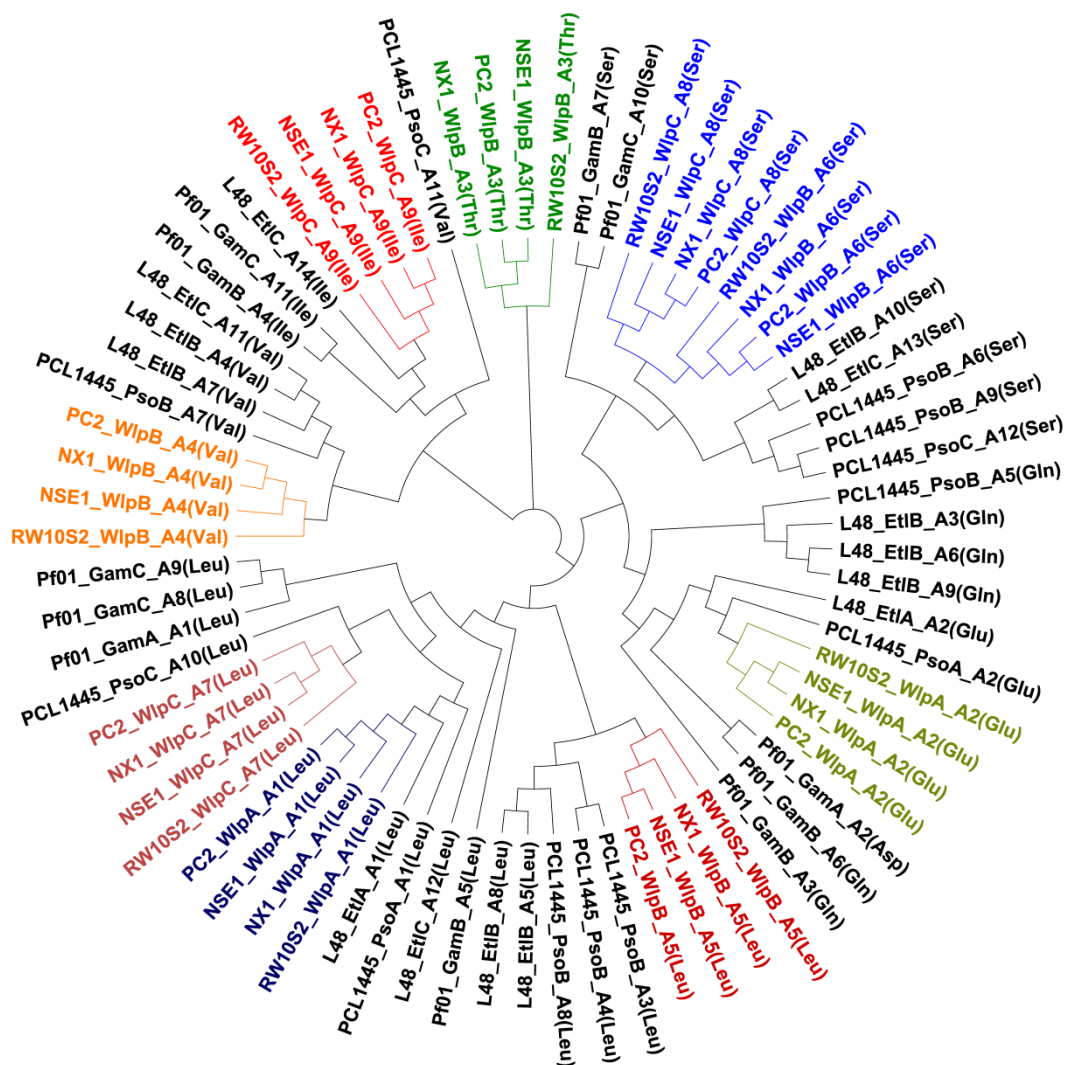

**Figure S5. Phylogeny-based substrate specificity prediction of WLIP synthetases.**

Cladogram of neighbor joining tree inferred from amino acid sequence alignment of adenylation (A) domains extracted from already characterized and putative *Pseudomonas* CLP NRPSs for the biosynthesis of WLIP. Lipopeptide-specific codes are: Etl (entolysin, *P. entomophila* L48); Pso (putisolvin, *P. putida* PCL1445); Gam (gacamide, *P. fluorescens* Pf01); Wlp (WLIP, *P. putida* RW10S2, and *Pseudomonas* sp. NSE1); Wlp (putative WLIP, *P. putida* PC2 and NX1). For each domain the substrate specificity is indicated in parentheses using the standard amino acid three-letter code. Clusters comprising WLIP domains are highlighted in different colors.

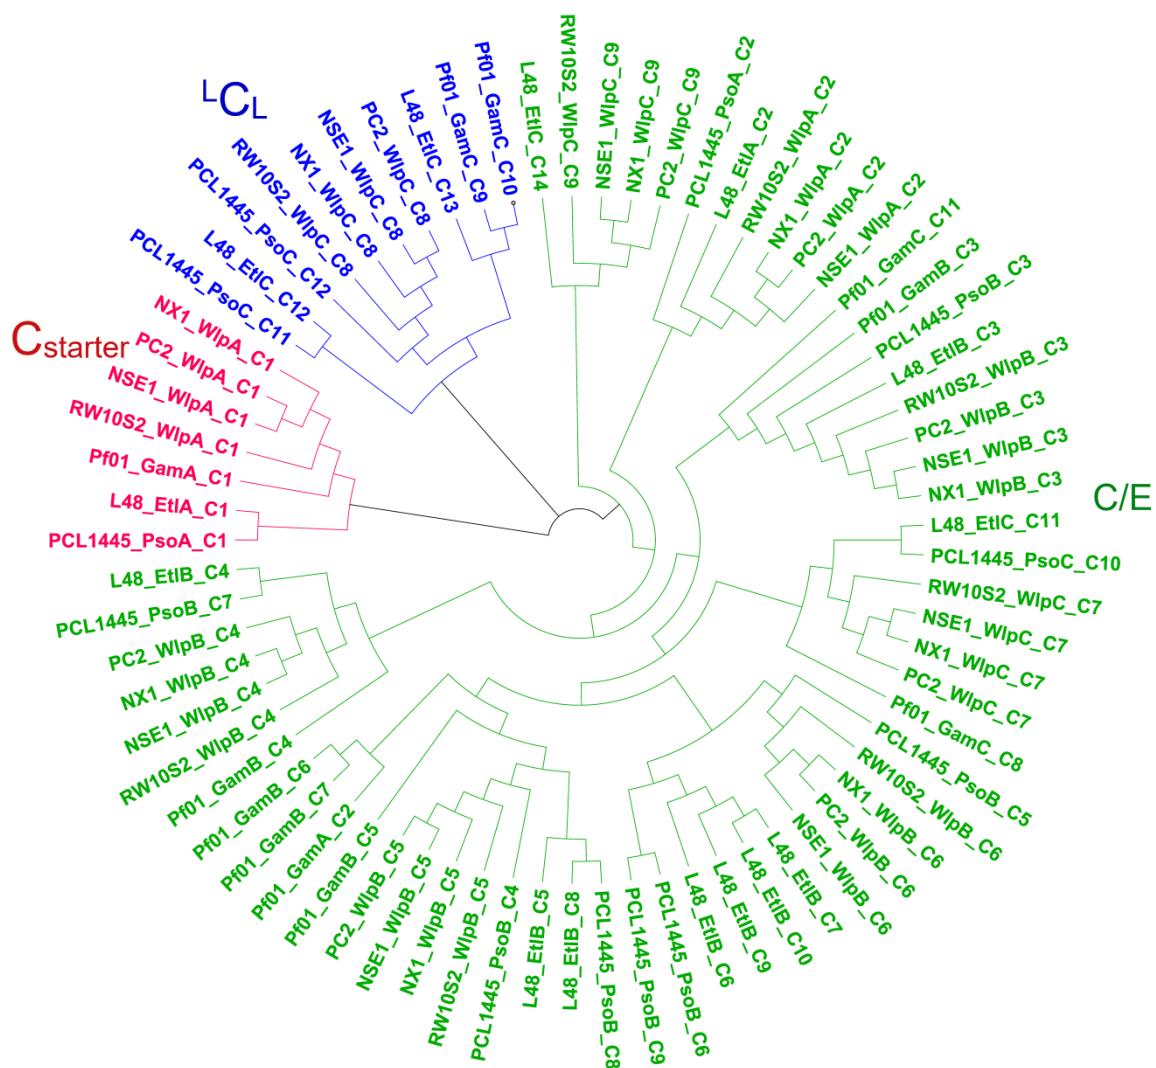

**Figure S6. Phylogenetic analysis of condensation domains from WLIP- and putative WLIP-producing *Pseudomonas* species.**

Cladogram of neighbor joining tree inferred from amino acid sequence alignment of condensation (C) domains extracted from already characterized and putative WLIP-producing strains. Lipopeptide-specific codes are: EtI (entolysin, *P. entomophila* L48); Pso (putisolvin, *P. putida* PCL1445); Gam (gacamide, *P. fluorescens* Pf01); Wlp (WLIP, *P. putida* RW10S2, and *Pseudomonas* sp. NSE1); Wlp (putative WLIP, *P. putida* PC2 and NX1).

**Table S1.** *Pseudomonas* genomes/sequences retrieved from GenBank

| Strain                                                           | Origin                                         | CLP                          | Accession              | Reference                                                     |
|------------------------------------------------------------------|------------------------------------------------|------------------------------|------------------------|---------------------------------------------------------------|
| <i>P. koreensis</i> BS3658                                       | -                                              | ND                           | NZ_LT629687            | Unpublished                                                   |
| <i>P. chlororaphis</i> EA105                                     | Rice roots, California, USA                    | ND                           | JSFK00000000           | McCully et al., 2014; Spence et al. 2014                      |
| <i>Pseudomonas</i> sp. URIL14HWK12:I6                            | -                                              | ND                           | NZ_AZVL01000000        | Unpublished                                                   |
| <i>P. koreensis</i> P19E3                                        | Leaf of <i>Origanum majorana</i> , Switzerland | ND                           | CP027477, CP027481     | Schmid et al., 2018                                           |
| <i>P. fluorescens</i> MIS38                                      | Oil spill soil, Japan                          | arthrofactin                 | AB107223.1, AB286215.1 | Lange et al., 2012                                            |
| <i>Pseudomonas</i> sp. Irchel_s3a10                              | Soil, Switzerland                              | ND                           | GCA_900187525.1        | Butaite et al., 2017                                          |
| <i>Pseudomonas</i> sp. GM30                                      | <i>Populus deltoides</i> roots, Tennessee, USA | ND                           | GCF_000282275.2        | Weston et al., 2012                                           |
| <i>P. koreensis</i> CRS05-R5                                     | Rice rhizosphere, China                        | ND                           | CP015852               | Lin et al., 2016                                              |
| <i>P. fluorescens</i> HKI0770                                    | Forest soil sample, Germany                    | anikasin                     | LVEJ01000000           | Götze et al. 2017                                             |
| <i>P. putida</i> RW10S2                                          | Rice rhizosphere, Sri Lanka                    | WLIP                         | JN982332.1, JN982333.1 | Rokni-Zadeh et al., 2012                                      |
| <i>P. putida</i> PC2                                             | <i>Pistacia chinensis</i> , China              | ND                           | CP011789.1             | Song et al., 2017                                             |
| <i>P. putida</i> NX-1                                            | Leaf mold, China                               | ND                           | CP030750.1             | Xu et al., 2018                                               |
| Sequence                                                         |                                                | Housekeeping genes accession |                        |                                                               |
|                                                                  |                                                | <i>rpoB</i>                  | <i>rpoD</i>            |                                                               |
| <i>P. fluorescens</i> LMG 5167 <sup>T</sup>                      | -                                              | AJ748158                     | D86033                 | Ait Tayeb <i>et al.</i> , 2005                                |
| <i>P. chlororaphis</i> subsp. aureofaciens LMG 1245 <sup>T</sup> | -                                              | AJ717426.1                   | FN554453.1             | Ait Tayeb <i>et al.</i> , 2005                                |
| <i>P. koreensis</i> LMG 21318 <sup>T</sup>                       | -                                              | FN554737                     | FN554476               | Mulet <i>et al.</i> , 2010                                    |
| <i>P. putida</i> LMG 2257 <sup>T</sup>                           | -                                              | AJ717474                     | AB039581               | Ramette <i>et al.</i> , 2011                                  |
| <i>P. aeruginosa</i> LMG 1242 <sup>T</sup>                       | -                                              | AJ717442                     | AB039611               | Yamamoto <i>et al.</i> , 2000; Ait Tayeb <i>et al.</i> , 2005 |

\*ND, Not determined



**Table S2.** Alignment of the amino acid sequence of lokisin produced by *Pseudomonas* sp. COR10 with other (putative) CLPs of the amphisin group. The lipopeptide structures of arthrofactin (MIS38), anikasin (KHI0770), and lokisin (DSS41, COR10) have been chemically elucidated. The amino acid stereochemistry was determined for arthrofactin (complete), anikasin (complete) and DSS41 lokisin (partial). The other structures are predictions based on phylogenetic analysis of adenylation domains (see Figure S1). Their probable amino acid configurations are predicted by phylogenetic analysis of C-domains (Fig. S2).

| <i>Pseudomonas</i> sp. | CLP                   | FA         | A1    | A2    | A3     | A4    | A5    | A6    | A7    | A8    | A9    | A10   | A11   |
|------------------------|-----------------------|------------|-------|-------|--------|-------|-------|-------|-------|-------|-------|-------|-------|
| COR10                  | Lokisin               | 3-OH C10   | D-Leu | D-Asp | D-aThr | D-Leu | D-Leu | D-Ser | L-Leu | D-Ser | L-Leu | L-Ile | Asp   |
| DSS41                  | Lokisin               | 3-OH C10   | Leu   | Asp   | D-aThr | Leu   | Leu   | D-Ser | Leu   | D-Ser | Leu   | L-Ile | Asp   |
| URIL14HWK12:I6         | Putative lokisin      | FA         | D-Leu | D-Asp | D-aThr | D-Leu | D-Leu | D-Ser | L-Leu | D-Ser | L-Leu | L-Ile | Asp   |
| P19E3                  | Putative lokisin      | FA         | D-Leu | D-Asp | D-aThr | D-Leu | D-Leu | D-Ser | L-Leu | D-Ser | L-Leu | L-Ile | Asp   |
| MIS38                  | Arthrofactin          | C10 (3-OH) | D-Leu | D-Asp | D-aThr | D-Leu | D-Leu | D-Ser | L-Leu | D-Ser | L-Ile | L-Ile | L-Asp |
| Irchel_s3a10           | Putative arthrofactin | FA         | D-Leu | D-Asp | D-aThr | D-Leu | D-Leu | D-Ser | L-Leu | D-Ser | L-Ile | L-Ile | Asp   |
| GM30                   | Putative arthrofactin | FA         | D-Leu | D-Asp | D-aThr | D-Leu | D-Leu | D-Ser | L-Leu | D-Ser | L-Ile | L-Ile | Asp   |
| CRS05-R5               | Putative arthrofactin | FA         | D-Leu | D-Asp | D-aThr | D-Leu | D-Leu | D-Ser | L-Leu | D-Ser | L-Ile | L-Ile | Asp   |
| BS3658                 | Putative arthrofactin | FA         | D-Leu | D-Asp | D-aThr | D-Leu | D-Leu | D-Ser | L-Leu | D-Ser | L-Ile | L-Ile | Asp   |
| HKI0770                | Anikasin              | C10 (3-OH) | D-Leu | D-Asp | D-aThr | D-Leu | D-Leu | D-Ser | L-Leu | D-Ser | L-Leu | L-Ile | L-Asp |
| EA105                  | New CLP               | FA         | D-Leu | D-Asp | D-aThr | D-Leu | D-Leu | D-Ser | L-Leu | D-Gln | L-Ile | L-Ile | Asp   |

**Table S3.** Homology of NRPS enzymes and proteins encoded by the flanking regions identified from the lokisin-producing *Pseudomonas* sp. COR10 and related strains. Identity level of protein sequences were compared to those of *Pseudomonas* sp. COR10 by BLASTp search. The gene numbers in the first column refer to the gene cluster in Figure 6A.

| Gene        | NRPS and flanking proteins                                                             | URIL14HWK12:I6        | P19E3 | Irchel_s3a10          | GM30                  | MIS38             | BS3658 | CRS05-R5 | HKI0770 | EA105 |
|-------------|----------------------------------------------------------------------------------------|-----------------------|-------|-----------------------|-----------------------|-------------------|--------|----------|---------|-------|
| 1           | ABC-type nitrate/sulfonate/bicarbonate transport systems, periplasmic components       | 99%<br>WP_027613132.1 | -     | 99%<br>WP_095139611.1 | 97% WP_007965827.1    | NA                | -      | -        | -       | 95%   |
| 2           | Hypothetical protein                                                                   | 89%<br>WP_027613131.1 | 82%   | 83%<br>WP_095139609.1 | 90%<br>WP_007965822.1 | NA                | 77%    | 77%      | 28%     | 66%   |
| 3           | Copper metallochaperone, bacterial analog of Cox17 protein                             | -                     | 96%   | 99%<br>WP_095139608.1 | 99%<br>WP_007965820.1 | NA                | 94%    | 94%      | 89%     | 86%   |
| 4           | Cytochrome oxidase biogenesis protein Sco1/SenC/PrrC, putative copper metallochaperone | 99%<br>WP_027613129.1 | 97%   | 98%<br>WP_102357144.1 | 89%<br>WP_064595539.1 | NA                | 99%    | 99%      | 90%     | 89%   |
| <i>lokT</i> | RND efflux system, outer membrane lipoprotein                                          | 98%<br>WP_049827914.1 | 95%   | 96%<br>WP_095139607.1 | 97%<br>WP_007965818.1 | NA                | 94%    | 94%      | 90%     | 90%   |
| <i>lokR</i> | LuxR family transcriptional regulator                                                  | 99%<br>WP_027613127.1 | 98%   | 98%<br>WP_095139606.1 | 99%<br>WP_007965817.1 | NA                | 98%    | 98%      | 90%     | 88%   |
| <i>lokA</i> | Non-ribosomal peptide synthetase                                                       | 97%<br>WP_027613126.1 | 94%   | 95%<br>WP_095139605.1 | 96%<br>WP_024164422.1 | 97%<br>BAC67534.2 | 90%    | 90%      | 76%     | 77%   |
| <i>lokB</i> | Non-ribosomal peptide synthetase                                                       | 97%<br>WP_027613125.1 | 96%   | 97%<br>WP_095139604.1 | 95%<br>WP_007965814.1 | 97%<br>BAC67535.1 | 93%    | 92%      | 83%     | 83%   |
| <i>lokC</i> | Non-ribosomal peptide synthetase                                                       | 97%<br>WP_027613124.1 | 95%   | 90%<br>WP_095139603.1 | 90%<br>WP_024164421.1 | 90%<br>BAC67536.1 | 86%    | 86%      | 88%     | 77%   |
| <i>macA</i> | Macrolide efflux protein MacA                                                          | 99%<br>WP_027613123.1 | 99%   | 98%<br>WP_095139602.1 | 99%<br>WP_007969710.1 |                   | 97%    | 97%      | 91%     | 91%   |
| <i>macB</i> | Macrolide efflux protein MacB                                                          | 99%<br>WP_098968302.1 | 99%   | 98%<br>WP_095139601.1 | 99%<br>WP_007969709.1 | 99%<br>BAF40423.1 | 96%    | 96%      | 92%     | 91%   |
| 5           | Hypothetical protein                                                                   | -                     | -     | -                     | -                     | -                 | -      | -        | -       | -     |
| 6           | Tryptophan synthase beta chain like                                                    | 96%<br>WP_027613717.1 | 94%   | 98%<br>WP_095139600.1 | 95%<br>WP_024164504.1 | 94%<br>BAF40424.1 | -      | -        | -       | -     |
| 7           | Hypothetical protein                                                                   | 93%<br>WP_027613716.1 | -     | 93%<br>WP_095135582.1 | 91%<br>WP_007966403.1 | 93%<br>BAF40425.1 | -      | -        | -       | -     |
| 8           | Hypothetical protein                                                                   | 78%<br>WP_049827959.1 | -     | 85%<br>WP_095135584.1 | -                     | NA                | -      | -        | -       | -     |

**Table S4.** WLIP synthetases and proteins encoded by the flanking region identified from *Pseudomonas* sp. NSE1 and related strains. Identity level of protein sequences were compared by BLASTp search. The gene numbers in the first column refer to Figure 6B.

| Gene        | WLIP synthetases and flanking proteins              | <i>Pseudomonas</i> sp. |            |            |
|-------------|-----------------------------------------------------|------------------------|------------|------------|
|             |                                                     | RW10S2                 | NX-1       | PC2        |
| 1           | TraX family protein                                 | 95%                    | 100%       | 100%       |
| 2           | Transcriptional regulator, LysR family              | 98%                    | 99%        | 100%       |
| 3           | Probable monooxygenase                              | 98%                    | 99%        | 99%        |
| <i>wlpT</i> | RND efflux system, outer membrane lipoprotein       | AFJ23816.1             | AXA25193.1 | ANC03467.1 |
|             |                                                     | 94%                    | 99%        | 99%        |
| <i>wlpR</i> | LuxR family transcriptional regulator               | AFJ23817.1             | AXA25192.1 | ANC03466.1 |
|             |                                                     | 94%                    | 99%        | 100%       |
| <i>wlpA</i> | Non-ribosomal peptide synthetase                    | AFJ23818.1             | AXA25191.1 | ANC03465.1 |
|             |                                                     | 95%                    | 99%        | 99%        |
|             |                                                     | AFJ23819.1             | AXA25190.1 | ANC03464.1 |
|             |                                                     | 94%                    | 100%       | 100%       |
| 4           | Transporter, LysE family                            | 95%                    | 100%       | 100%       |
| 5           | Integral membrane protein                           | 92%                    | 100%       | 100%       |
| 6           | Hypothetical protein                                | -                      | 100%       | 100%       |
| 7           | Pli0014 protein                                     | -                      | 100%       | 100%       |
| 8           | 3-demethylubiquinone-9 3-methyltransferase          | -                      | 100%       | 100%       |
| 9           | Outer membrane ferripyoverdine receptor             | -                      | 99%        | 99%        |
| 1           | PvdE, pyoverdine ABC export system                  | -                      | 100%       | 100%       |
| 2           | L-ornithine 5-monooxygenase, PvdA                   | -                      | 100%       | 100%       |
| 2           | Hypothetical protein                                | -                      | 100%       | 100%       |
| 4           | PvdO, Pyoverdine responsive serine/threonine kinase | -                      | 100%       | 100%       |
| 5           | Pyoverdin biosynthesis protein, PvdN                | -                      | 100%       | 100%       |
| 6           | Putative dipeptidase, pyoverdin biosynthesis PvdM   | -                      | 100%       | 100%       |
| 7           | Alkanesulfonates-binding protein                    | -                      | 100%       | 100%       |
| 8           | Acyl-CoA dehydrogenase                              | 99%                    | 100%       | 99%        |
| 9           | FMN reductase                                       | 99%                    | 99%        | 100%       |
| <i>wlpB</i> | Non-ribosomal peptide synthetase                    | 96%                    | 99%        | 99%        |
| <i>wlpC</i> | Non-ribosomal peptide synthetase                    | AFJ23825.1             | AXA25123.1 | ANC03402.1 |
|             |                                                     | 94%                    | 99%        | 99%        |
| <i>wlpD</i> | Macrolide efflux protein MacA                       | AFJ23826.1             | AXA25122.1 | ANC03401.1 |
|             |                                                     | 99%                    | 100%       | 100%       |
| <i>wlpE</i> | Macrolide efflux protein MacB                       | AFJ23827.1             | AXA25121.1 | ANC03400.1 |
|             |                                                     | 99%                    | 100%       | 100%       |
|             |                                                     | AFJ23828.1             | AXA25120.1 | ANC03399.1 |
| 10          | Oligopeptide ABC transporter, OppA                  | 70%                    | 99%        | 99%        |
| 11          | Oligopeptide ABC transporter, OppA                  | 94%                    | 97%        | 97%        |
| 12          | LuxR family transcriptional regulator               | 96%                    | 100%       | 99%        |
| 13          | Inositol-1-monophosphatase                          | 97%                    | 100%       | 100%       |
| 14          | Peptidyl-prolyl cis-trans isomerase PpiC            | 100%                   | 100%       | 100%       |
| 15          | Acetoacetyl-CoA synthetase                          | 95%                    | 99%        | 100%       |

References: NX-1 (Xu et al., 2018); PC2 (Song et al., 2017); RW10S2 (Rokni-Zadeh et al., 2012)

**Table S5.** Alignment of amino acids sequence of WLIP produced by *Pseudomonas* sp. NSE1 and other strains

| <b>Strains</b>                   | <b>FA</b> | <b>A1</b> | <b>A2</b> | <b>A3</b> | <b>A4</b> | <b>A5</b> | <b>A6</b> | <b>A7</b> | <b>A8</b> | <b>A9</b> |
|----------------------------------|-----------|-----------|-----------|-----------|-----------|-----------|-----------|-----------|-----------|-----------|
| <i>Pseudomonas</i> sp. NSE1      | 3-OH C10  | L-Leu     | D-Glu     | D-Thr     | D-Val     | D-Leu     | D-Ser     | L-Leu     | D-Ser     | L-Ile     |
| <i>Pseudomonas putida</i> RW10S2 | 3-OH C10  | L-Leu     | D-Glu     | D-Thr     | D-Val     | D-Leu     | D-Ser     | L-Leu     | D-Ser     | L-Ile     |
| <i>Pseudomonas putida</i> NX-1   | ND        | L-Leu     | D-Glu     | D-Thr     | D-Val     | D-Leu     | D-Ser     | L-Leu     | D-Ser     | L-Ile     |
| <i>Pseudomonas putida</i> PC2    | ND        | L-Leu     | D-Glu     | D-Thr     | D-Val     | D-Leu     | D-Ser     | L-Leu     | D-Ser     | L-Ile     |

\*FA, Fatty acid

ND, Not determined
